# Supplementary material for: The interplay between size and valence state on the antibacterial activity of sub-10 nm silver nanoparticles
Source: PubMed Central journal article supplement — Nanoscale Adv. 2019 Apr 30;1(6):2365–71. doi: 10.1039/c9na00017h (PMC9417850; doi:10.1039/c9na00017h), 2019-04-30
Supplement: NA-001-C9NA00017H-s001.pdf [file NA-001-C9NA00017H-s001.pdf]

## Supplementary Information

# The interplay between size and valence state on the antibacterial activity of sub-10 nm silver nanoparticles

*Hanif Haidari<sup>a</sup>, Nirmal Goswami<sup>b</sup>, Richard Bright<sup>b</sup>, Zlatko Kopecki<sup>c,d</sup>, Allison Cowin<sup>c,d</sup>, Sanjay  
Garg<sup>a</sup>, and Krasimir Vasilev <sup>\*b,d</sup>*

<sup>a</sup> Centre for Pharmaceutical Innovation and Development, School of Pharmacy and Medical Sciences, University of South Australia, Adelaide, SA 5000, Australia

<sup>b</sup> School of Engineering, University of South Australia, Mawson Lakes, SA, 5095, Australia

<sup>c</sup> Regenerative medicine, Future Industries Institute, University of South Australia, Australia

<sup>d</sup> Future Industries Institute, University of South Australia, Mawson Lakes SA 5095, Australia.

## Characterizations of MSA-Silver Nanoparticles

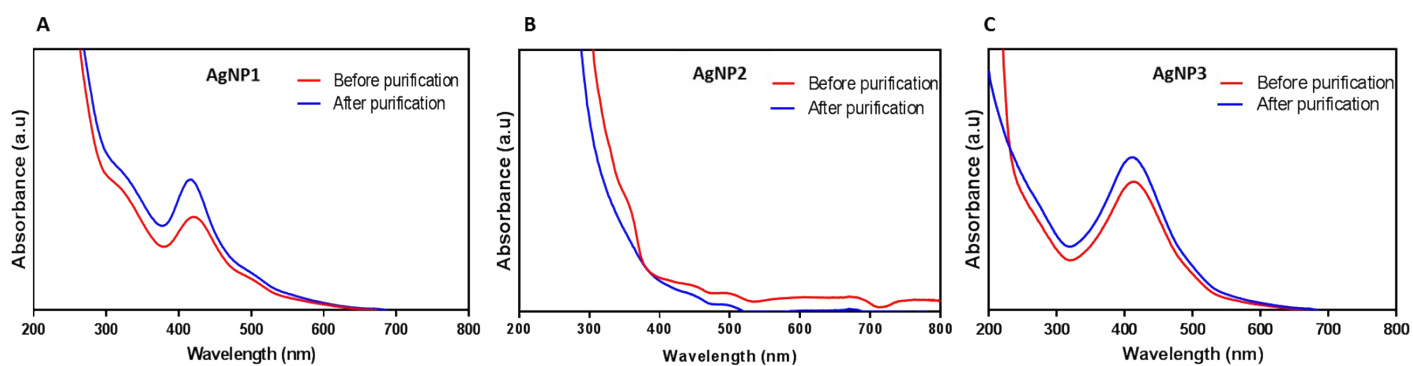

**Fig.S1** (A-C) UV-vis spectra of all three AgNPs before and after purification through dialysis membrane.

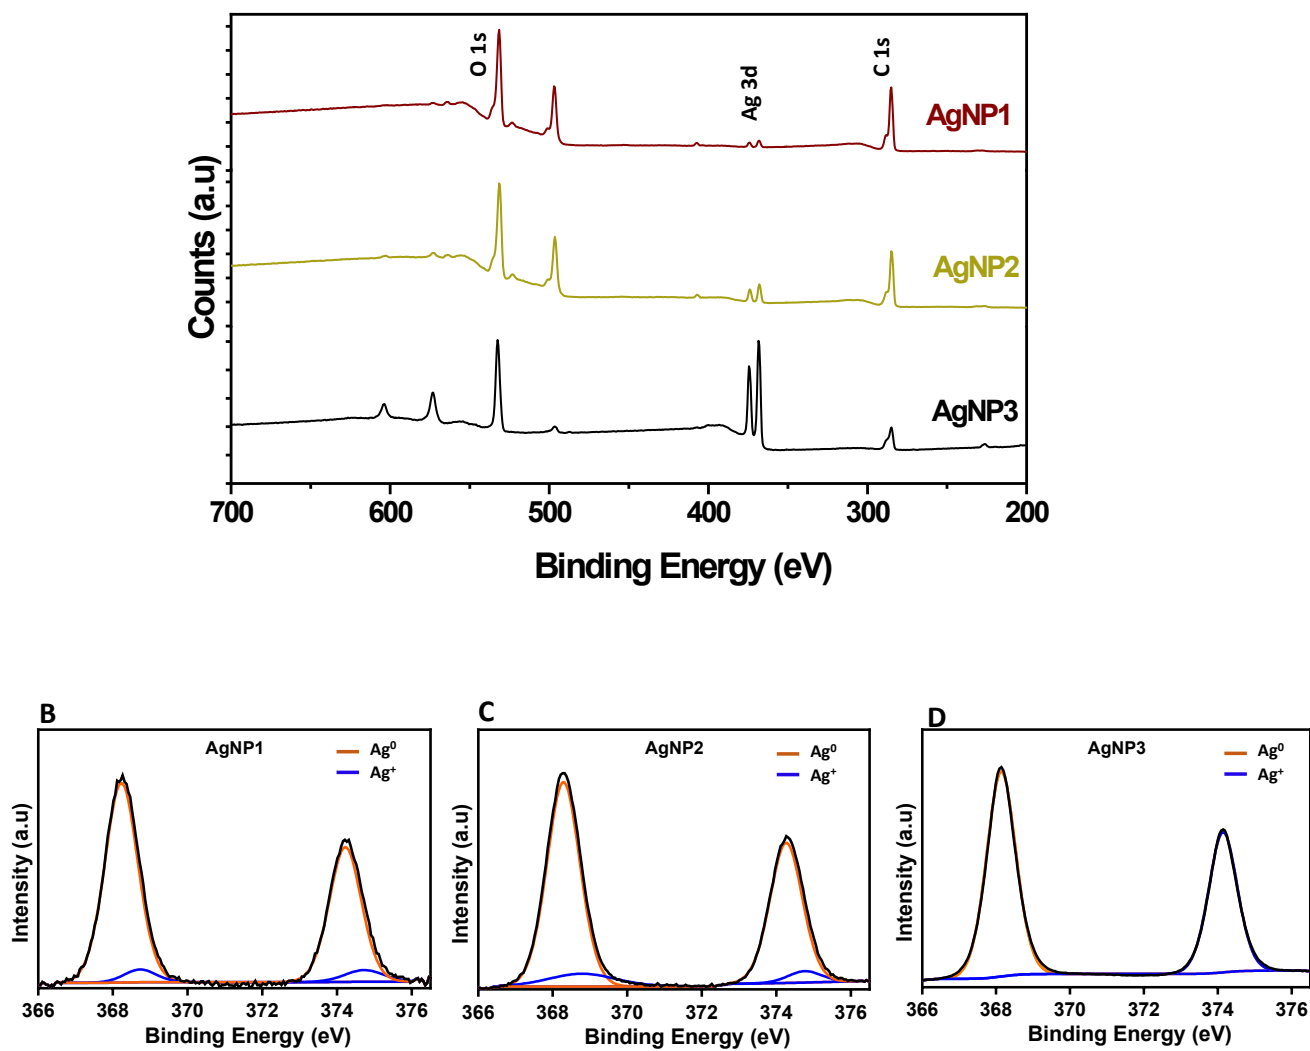

**Fig.S2** (A) XPS survey spectra of the AgNPs (B-D) High resolution of Ag 3d deconvolution.

| <b>Samples</b> | <b>% of Ag<sup>0</sup><sup>444</sup></b> | <b>% of Ag<sup>+</sup></b> |
|----------------|------------------------------------------|----------------------------|
| <b>AgNP1</b>   | 86.8                                     | 13.2                       |
| <b>AgNP2</b>   | 90.79                                    | 9.21                       |
| <b>AgNP3</b>   | 98.11                                    | 1.89                       |

**Table S1** Differences on silver oxidation state of the AgNPs obtained from Ag 3d deconvolution.

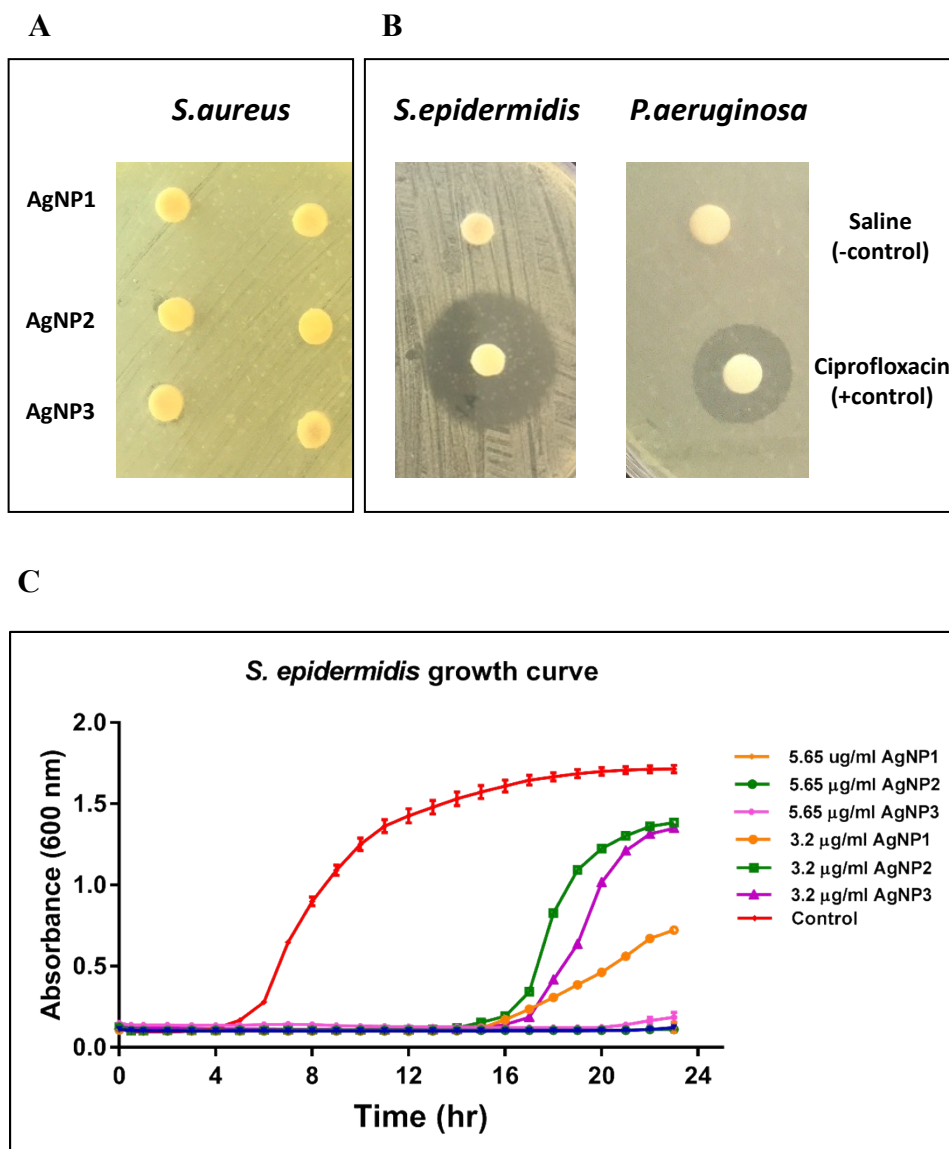

**Fig.S3** (A) Zone of inhibition AgNPs (90  $\mu\text{g/ml}$ ) against *S.aureus* (B) Ciprofloxacin (90  $\mu\text{g/ml}$ ) and 0.9% saline effect against *S.epidermidis* and *P.aeruginosa*. (C) Representative strain (*S.epidermidis*) growth curve treated with AgNPs at MIC concentration and 0.5X MIC value.
